# Supplementary material for: Immunoglobulin light chain (IgL) genes in zebrafish: Genomic configurations and inversional rearrangements between (VL–JL–CL) gene clusters
Source: Dev Comp Immunol. 2008;32(4):421–34. doi: 10.1016/j.dci.2007.08.005 (PMC3014032; doi:10.1016/j.dci.2007.08.005)

**Supplementary Online Fig. 1: Comparison of zebrafish V<sub>L</sub> segments.** Amino acids percent identity matrix calculated according to Spalding and Lammers (2004). Identities  $\geq 70\%$  designation for Ig “V families” (Matsuda 2004) depicted as shaded boxes. At least 5 distinct families were identified; each by chromosome as shown. Apparent pseudogenes and truncated V<sub>L</sub> sequences were omitted from analyses.

Spalding JB, Lammers (2004) *Nucleic Acids Res* 32:26-32.

Matsuda F (2004) *Molecular Biology of B Cells*. eds Honjo T, Alt F, Neuberger M (Elsevier) Pp: 1-17.

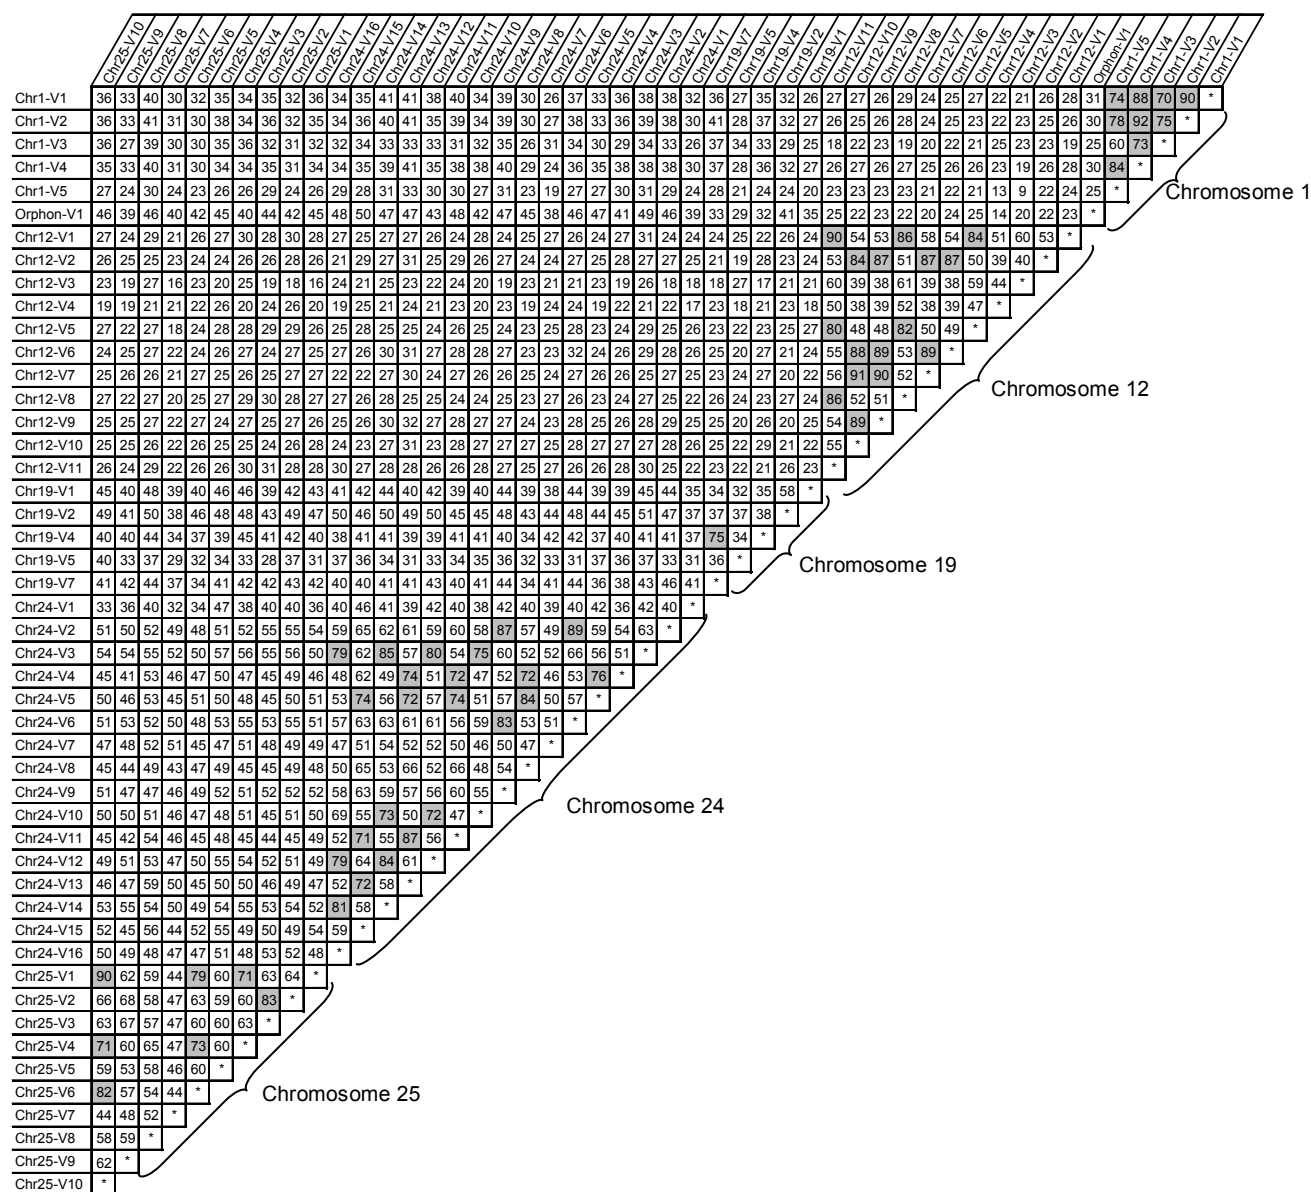

Supplement: Supplementary file 1 — Fig. S1. Comparison of zebrafish VL segments. Amino acids percent identity matrix calculated according to Spalding and Lammers (2004). Identities ⩾70% designation for Ig “V families” (Matsuda, 2004) depicted as shaded boxes. At least 5 distinct families were identified, each by chromosome as shown. Apparent pseudogenes and truncated VL sequences were omitted from analyses.Spalding JB, Lammers (2004) Nucleic Acids Res 32:26–32.Matsuda F (2004) Molecular Biology of B Cells. eds Honjo T, Alt F, Neuberger M (Elsevier) Pp: 1–17. [file mmc1.pdf]
